# Supplementary material for: Structural Analyses of CrtJ and Its B12-Binding Co-Regulators SAerR and LAerR from the Purple Photosynthetic Bacterium Rhodobacter capsulatus
Source: MDPI journal article supplement (doi:10.3390/microorganisms10050912), 2022-04-27
Supplement: s1 [file s1]

**Supplemental Table S1. Data-collection and refinement statistics**

|                                   | SAerR                         | SAerR              |
|-----------------------------------|-------------------------------|--------------------|
| <i>Data collection</i>            |                               |                    |
| Wavelength (Å)                    | 1.00003                       | 1.5998             |
| Space group                       | P 61 2 2                      | P 61 2 2           |
| <i>Cell dimensions</i>            |                               |                    |
| a, b, c (Å)                       |                               |                    |
| $\alpha$ , $\beta$ , $\gamma$ (°) | 90.00 90.00 120.00            | 90.00 90.00 120.00 |
| Resolution (Å)                    | 47.32 – 2.25                  | 47.57 – 2.75       |
| R <sub>merge</sub>                | 0.104 (1.804)                 | 0.162 (2.410)      |
| R <sub>meas</sub>                 | 0.107 (1.861)                 | 0.164 (2.444)      |
| R <sub>pim</sub>                  | 0.024 (0.451)                 | 0.026 (0.402)      |
| Total reflections                 | 217102 (16919)                | 246389 (32385)     |
| No. unique reflections            | 11257 (1005)                  | 6369 (891)         |
| CC1/2                             | 0.999 (0.687)                 | 0.999 (0.831)      |
| I/ $\sigma$ (I)                   | 20.6 (1.7)                    | 22.8 (1.8)         |
| Completeness (%)                  | 100.0 (100.0)                 | 100.0 (100.0)      |
| Multiplicity                      | 19.3 (16.8)                   | 38.7 (36.3)        |
| <i>Refinement</i>                 |                               |                    |
| Resolution (Å)                    | 47.32 – 2.25<br>(2.33 – 2.25) |                    |
| No. unique reflections            | 11189 (1083)                  |                    |
| R <sub>work</sub>                 | 0.2308 (0.3106)               |                    |
| R <sub>free</sub>                 | 0.2599 (0.3307)               |                    |
| <i>R.m.s.d values</i>             |                               |                    |
| Bond lengths (Å)                  | 0.007                         |                    |
| Bond angles (°)                   | 1.40                          |                    |
| <i>No. atoms</i>                  |                               |                    |
| Protein                           | 11572                         |                    |
| Ligand/ions                       | 102                           |                    |
| Solvent                           | 77                            |                    |
| <i>B-factors (Å<sup>2</sup>)</i>  |                               |                    |
| Protein                           | 30.11                         |                    |
| ligand/ions                       | 27.60                         |                    |
| Solvent                           | 30.50                         |                    |
| <i>Ramachandran plot</i>          |                               |                    |
| Favored (%)                       | 98.5                          |                    |
| Allowed (%)                       | 1.5                           |                    |
| Outliers (%)                      | 0.0                           |                    |
| Rotamer outliers (%)              | 0.0                           |                    |
| Clashscore                        | 6.14                          |                    |
| <i>PDB code</i>                   |                               |                    |

\*Highest-resolution shell values are shown in parentheses.
